# Supplementary material
Source: Springer Nature journal article supplement (https://www.springermedizin.de/resource/supplementary/12889_2008_1404_MOESM1_ESM.pdf/9503286)

F1

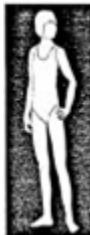

F2

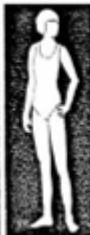

F3

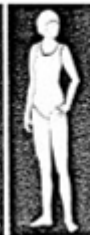

F4

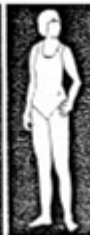

F5

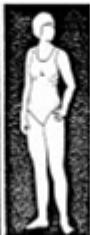

F6

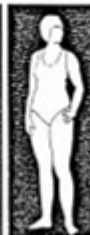

F7

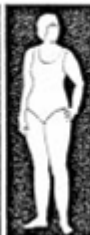

F8

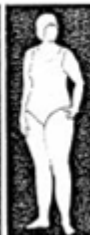

F9

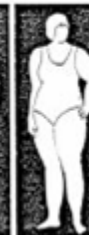

M1

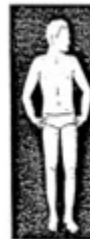

M2

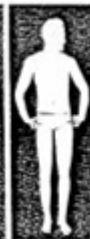

M3

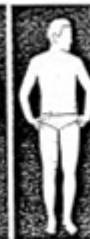

M4

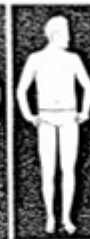

M5

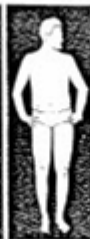

M6

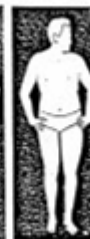

M7

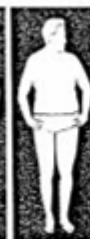

M8

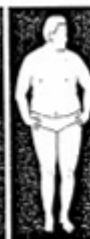

M9

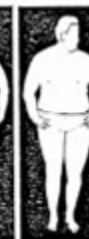

Supplement: MOESM1 [file 9503286]
